# Supplementary material
Source: Elsevier journal article supplement (https://www.sciencedirect.com/science/article/pii/S2174204919301801)
Supplement: mmc1 [file S2174204919301801:mmc1.docx]

***Suplementos***

| *Consenso, ano e referência* | *Definição proposta* |
| --- | --- |
| *National Lipid Association, 2014*  *[Rosenson RS, Baker SK, Jacobson TA, et al., The National Lipid Association’s Muscle Safety Expert Panel. An assessment by the Statin Muscle Safety Task Force: 2014 update. J Clin Lipidol. 2014;8 Suppl :S58–71]* | *Caracterizado pela incapacidade de tolerar* ***pelo menos 2 estatinas****: uma na dose* ***diária*** *inicial mais baixa E a outra independente dose diária, devido a* ***sintomas questionáveis (reais ou subjetivos) ou determinações laboratoriais anormais, relacionados temporalmente*** *com o tratamento e reversíveis com a suspensão da estatina, mas reprodutíveis após a reexposição,* ***desde que outros fatores determinantes conhecidos sejam excluídos.***  *A menor dose diária de estatina inicial é definida como rosuvastatina 5 mg, atorvastatina 10 mg, sinvastatina 10 mg, lovastatina 20 mg, 40 mg de pravastatina, 40 mg de fluvastatina e pitavastatina 2 mg.* |
| *International Lipid Expert Panel, 2015*  *[Banach M, Rizzo M, Toth PP, et al. Statin intolerance: an attempt at a unified definition. Position paper from an International Lipid Expert Panel. Arch Med Sci. 2015; 11: 1-23]* | 1. *Incapacidade de tolerar pelo menos* ***2*** *estatinas diferentes: uma na dose média diária inicial mais baixa e a outra em qualquer dose.* 2. *Intolerância comprovada por* ***efeitos adversos insuportáveis arrolados às estatinas ou anomalias significativas de biomarcadores*** 3. *Resolução ou melhoria significativa dos sintomas ou da variação dos biomarcadores após* ***diminuição da dose ou a descontinuação da estatina*** 4. *Sintomas ou variações dos biomarcadores não atribuíveis a fatores predisponentes comprovados, tais como interações medicamentosas e condições clínicas reconhecidas que aumentam o risco de intolerância às estatinas* |
| *Canadian Consensus Working Group, 2016*  *[Mancini GB, Baker S, Bergeron J, et al. Diagnosis, prevention, and management of statin adverse effects and intolerance: Canadian Consensus Working Group Update (2016). Can J Cardiol. 2016; 32 Suppl: S35–65]* | *Considerada 2 entidades interrelacionadas e complementares:*   1. ***Intolerância à estatina inibitória do objetivo terapêutico***  - *Síndrome clínica* - *Caracterizado por sintomas significativos e/ou alterações dos biomarcadores que impedem* ***o uso a longo prazo de e aderência*** *ao tratamento indicado com estatinas* - *Documentado por impugnação/suspensão (ou redução)/reexposição – “challenge/de-challenge/ rechallenge –, quando apropriado, usando pelo menos* ***2*** *estatinas, incluindo* **a atorvastatina e a rosuvastatina** - *Não devido a interações medicamentosas ou fatores de risco não tratados de intolerância às estatinas (e.g. hipotireoidismo não tratado)* - *E levando* ***à incapacidade de manter os objetivos terapêuticos*** *definidos pelas diretrizes nacionais e internacionais*  1. ***Resistência inibitória do objetivo terapêutico***    - *Presente nos doentes que aderem ao tratamento mas, por razões várias (variabilidade de resposta), não atingem a redução esperada ou adequados do LDL-colesterol, apesar da tolerância e cumprimento de doses máximas de estatinas*   *Nota: ambas as situações podem obrigar a combinações de antidislipidémicos, mas a perceção de potenciais efeitos adversos deve ser diferente* |

***Tabela 1. Definições de intolerância às estatinas***

*Adaptado de Rosenson RS, Baker S, Banach M, et al. Optimizing cholesterol treatment in patients with muscle complaints. J Am Coll Cardiol. 2017; 70(10): 1290-301. doi: 10.1016/j.jacc.2017.07.752.*

| *Classificação* | *Fenótipo* | *Incidência* | *Definição* |
| --- | --- | --- | --- |
| - *SMR 0* | *Elevação assintomática da CK < 4 × LSN* | *1,5 - 26%* | - *Sem sintomas musculares* |
| - *SRM 1* | *Mialgia suportável* | *190/100 000 doentes-ano* | - *Sintomas musculares sem elevação da CK* - *Aumento assintomático da CK < 7 × LSN* |
| - *SMR 2* | *Mialgia intolerável* | *30 - 260/100 000 doentes-ano* | - *Sintomas musculares, CK <7 × LSN* - *Recuperação completa após a descontinuação do tratamento* |
| - *SMR 3* | *Miopatia* | *5/100 000 doentes-ano* | - *Aumento da CK > 7 × LSN* - *Com sintomas ligeiros ou sem sintomas* - *Recuperação completa após a descontinuação* |
| - *SMR 4* | *Miopatia grave* | *140/100 000 doentes-ano* | - *Aumento da CK > 7 × mas < 50 × ULN,* - *Com sintomas musculares moderados a graves* - *Recuperação completa com a descontinuação* |
| - *SMR 5* | *Rabdomiólise* | *0,1 - 8,4/100 000 doentes-ano* | - *Aumento da CK > 7 × LSN e compromisso da função renal, com sintomas musculares* - *Ou CK > 50 × LSN* |
| - *SMR 6* | *Miosite necrotizante autoimune* | *0,1 - 0,3/100 000 doentes-ano* | - *Anticorpos anti-HMGCR* - *Expressão da HMGCR em biópsias musculares* - *Recuperação incompleta após a interrupção do tratamento* |

***Tabela 2. Fenótipos de miotoxicidade relacionados com as estatinas propostos pelo European Phenotype Standardization Project***

*Adaptado de Sposito AC, Faria Neto JR, Carvalho LS, et al.; on behalf of the Luso-Latin American Consortium on Statin-Associated Muscle Symptoms. Statin-associated muscle symptoms: position paper from the Luso-Latin American Consortium. Curr Med Res Opin. 2017; 33(2): 239-51. doi: 10.1080/03007995.2016.1252740. Abreviaturas: CK, creatinina quinase; HMGCR, redutase da 3-hidroxi-3-metilglutaril-Coenzima A; LSN, limite superior do normal; SMR, miotoxicidade relacionados com as estatinas).*

|  | ***Probabilidade da causalidade sintomática com o tratamento com estatinas*** | | | |
| --- | --- | --- | --- | --- |
|  | ***Provável*** | ***Improvável*** | |
| - *Distribuição regional* | - *Simétrico* - *Envolvimento generalizado ou dos grandes grupos musculares (membros inferiores proximais, gémeos, membros superiores proximais)* | | - *Assimétrico, unilateral* - *Pequenas regiões ou grupos musculares isolados* | |
| - *Características das queixas* | - *Dor, sensibilidade, cãibras, rigidez muscular* - *Fraqueza ou sensação de peso muscular durante o esforço* | | - *Dor aguda ou intensa* - *Formigueiro ou contractura muscular* - *Dores articulares ou tendinosas* | |
| - *Associação temporal* | - *Sintomas aparecem nas primeiras 4 semanas após o início da estatina* | | - *Sintomas aparecem > 12 semanas após o início da estatina* | |
|  | *(aparecimento de sintomas entre as de 4-12 semanas apoiam marginalmente a avaliação de causalidade)* | | | |
| - *Suspensão/reexposição* | - *Melhoria dos sintomas dentro de 4 semanas após a descontinuação da estatina* - *Reaparecimento dos sintomas dentro de 4 semanas após o reinício da estatina* | | - *Melhoria tardia ou inexistente dos sintomas após a descontinuação da estatina* - *Demora ou ausência de recorrência após a administração de novo da estatina* | |

***Tabela 3. Avaliação clínica da maior ou menor probabilidade da uma associação entre queixas musculares e o tratamento com estatinas***

*Adaptado de Sposito AC, Faria Neto JR, Carvalho LS, et al.; on behalf of the Luso-Latin American Consortium on Statin-Associated Muscle Symptoms. Statin-associated muscle symptoms: position paper from the Luso-Latin American Consortium. Curr Med Res Opin. 2017; 33(2): 239-251. doi: 10.1080/03007995.2016.1252740; Stulc T, Ceška R, Gotto AM Jr. Statin intolerance: the clinician's perspective. Curr Atheroscler Rep. 2015; 17(12): 69. doi: 10.1007/s11883-015-0552-3; Rosenson RS, Baker SK, Jacobson TA, et al., The National Lipid Association’s Muscle Safety Expert Panel. An assessment by the Statin Muscle Safety Task Force: 2014 update. J Clin Lipidol. 2014;8 Suppl :S58-7.*

| *Fatores endógenos* | *Fatores exógenos* |
| --- | --- |
| - *Antecedentes de sintomas musculares com outros antidislipidémicos* - *História de sintomas musculares inexplicáveis ou de elevação incompreensível da creatina quinase (CK)* - *História familiar de sintomas musculares com os antidislipidémicos* - *Género feminino* - *Idade avançada (> 80 anos)* - *(Hipertensão arterial)* - *(Diabetes mellitus)* - *Fragilidade clínica* - *Baixo índice de massa corporal* - *Doença renal ou hepática* - *Hipotireoidismo* - *Polimorfismos genéticos CYP450* - *Doenças musculares metabólicas* | - *Abuso da ingestão alcoólica* - *Exercício ou atividade física extenuante* - *Cirurgia com elevado teor de necessidades metabólicas* - *Deficiência de vitamina D* - *Interações medicamentosas (gemfibrozil, macrólidos, antifúngicos azólicos, verapamilo, amiodarona, inibidores da protease, ciclosporina)** |

***Tabela 4. Fatores associados ao aumento do risco de intolerância às estatinas***

*Adaptado de Stulc T, Ceška R, Gotto AM Jr. Statin intolerance: the clinician's perspective. Curr Atheroscler Rep. 2015; 17(12): 69. doi: 10.1007/s11883-015-0552-3; Nota: *A este propósito: Wiggins BS, Saseen JJ, Page RL 2n; American Heart Association Clinical Pharmacology Committee of the Council on Clinical Cardiology; Council on Hypertension; Council on Quality of Care and Outcomes Research; and Council on Functional Genomics and Translational Biology. Recommendations for management of clinically significant drug-drug interactions with statins and select agents used in patients with cardiovascular disease: a Scientific Statement from the American Heart Association. Circulation. 2016; 134(21): e468-e495.*
